# Supplementary material for: Population codes enable learning from few examples by shaping inductive bias
Source: eLife journal article supplement (doi:10.7554/elife.78606), 2022-12-16

**A**

Different Bandwidths Power Law

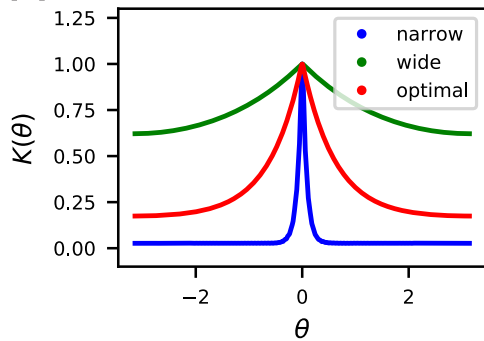

Spectra

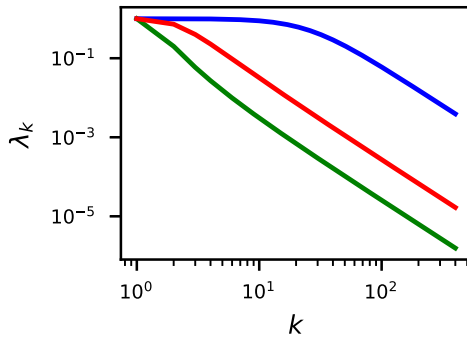

Bandwidth and Sample Efficiency

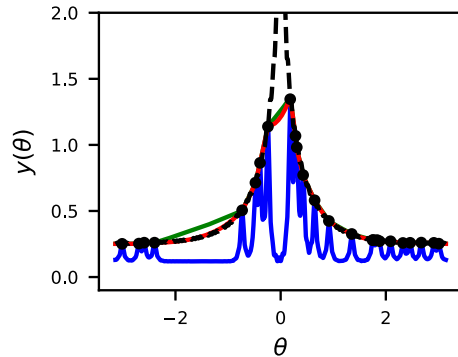**B**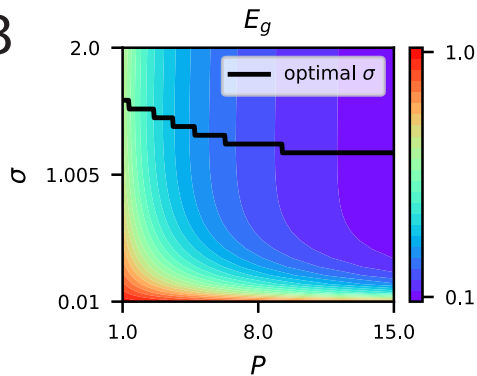

Bandwidth and Generalization

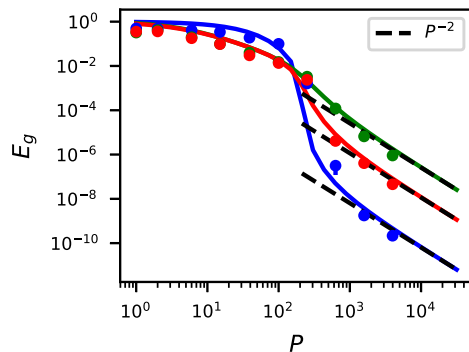

Supplement: supp [file elife-78606-supp-v1.zip]
