# Supplementary material for: Population codes enable learning from few examples by shaping inductive bias
Source: eLife journal article supplement (doi:10.7554/elife.78606), 2022-12-16

A

Drifting Gratings  $N = 10$ 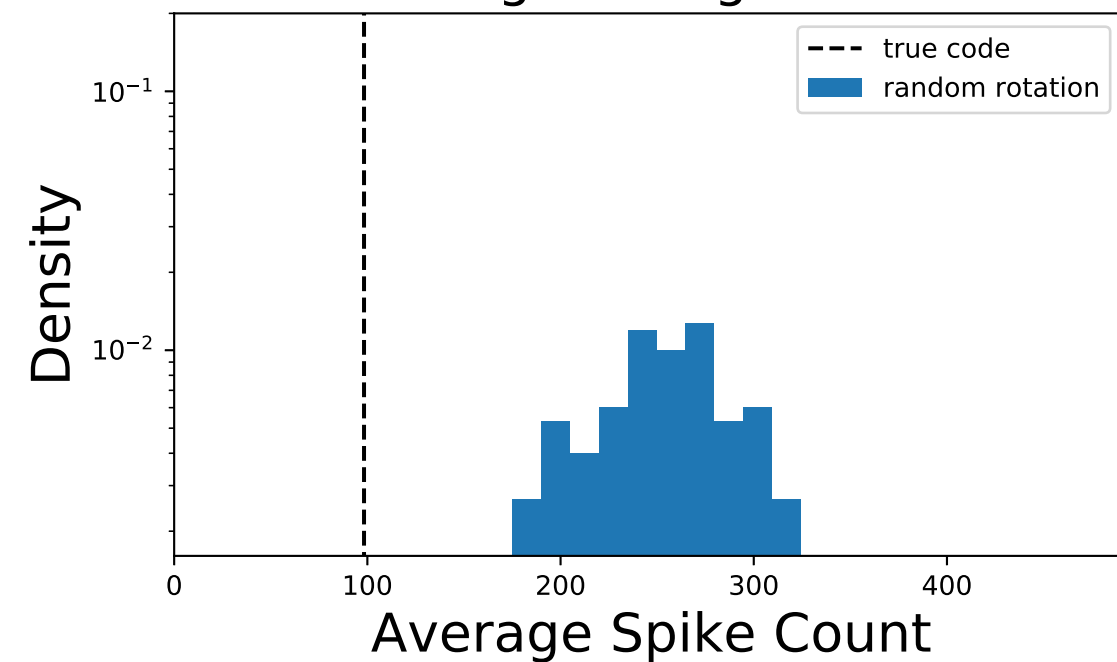

B

Drifting Gratings  $N = 500$ 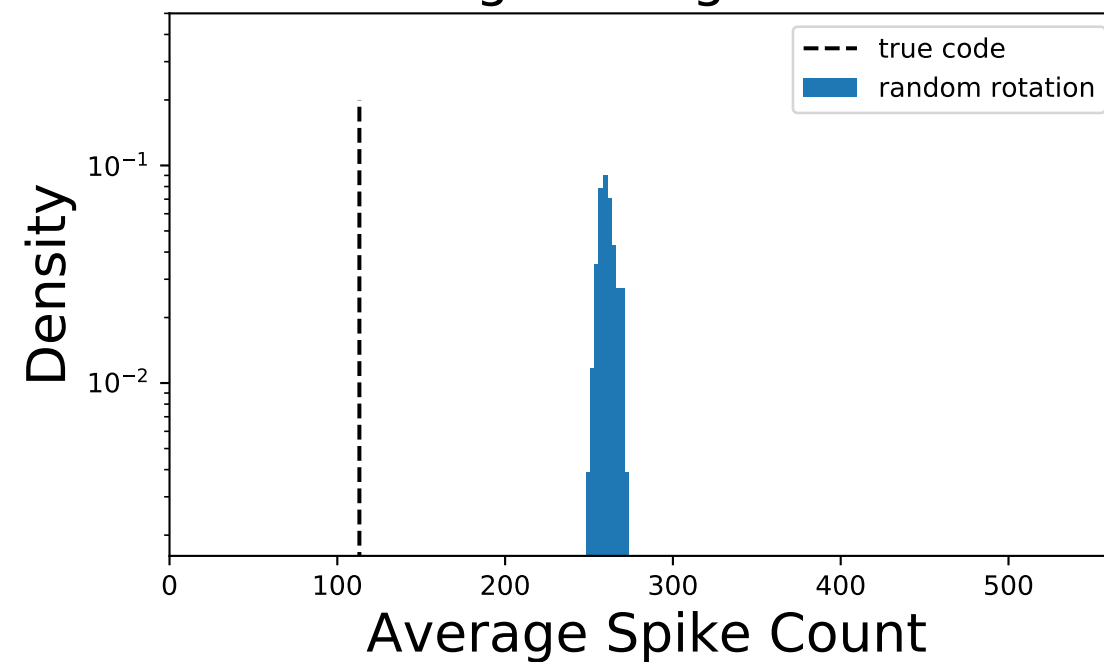

C

Allen Drift Gratings

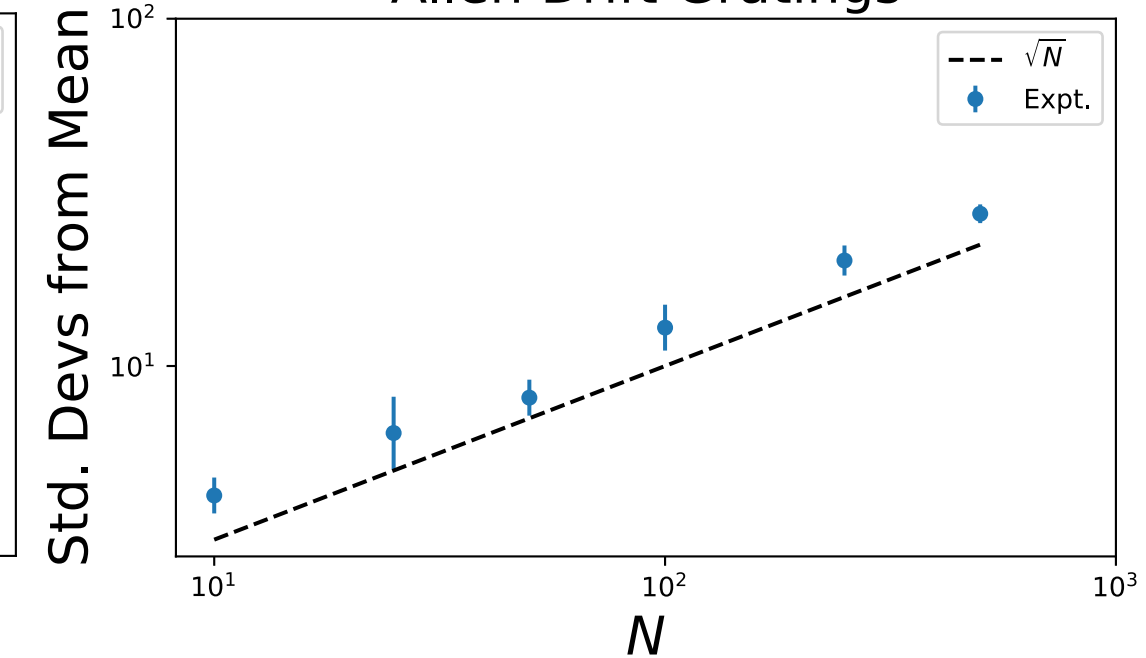

D

True Code

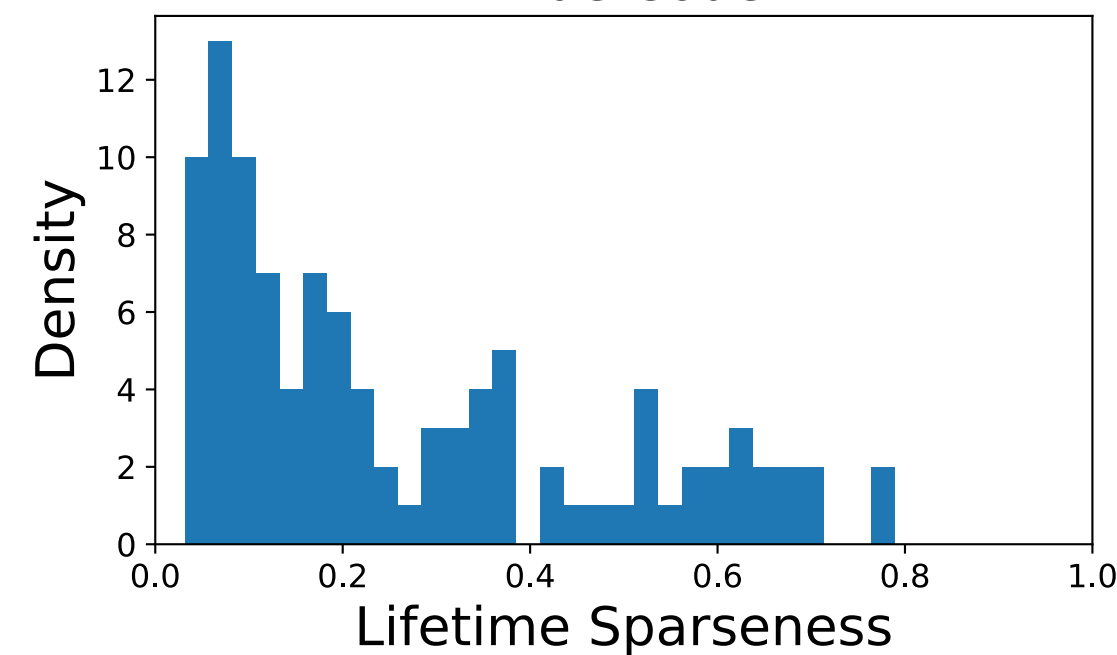

E

RROS Example

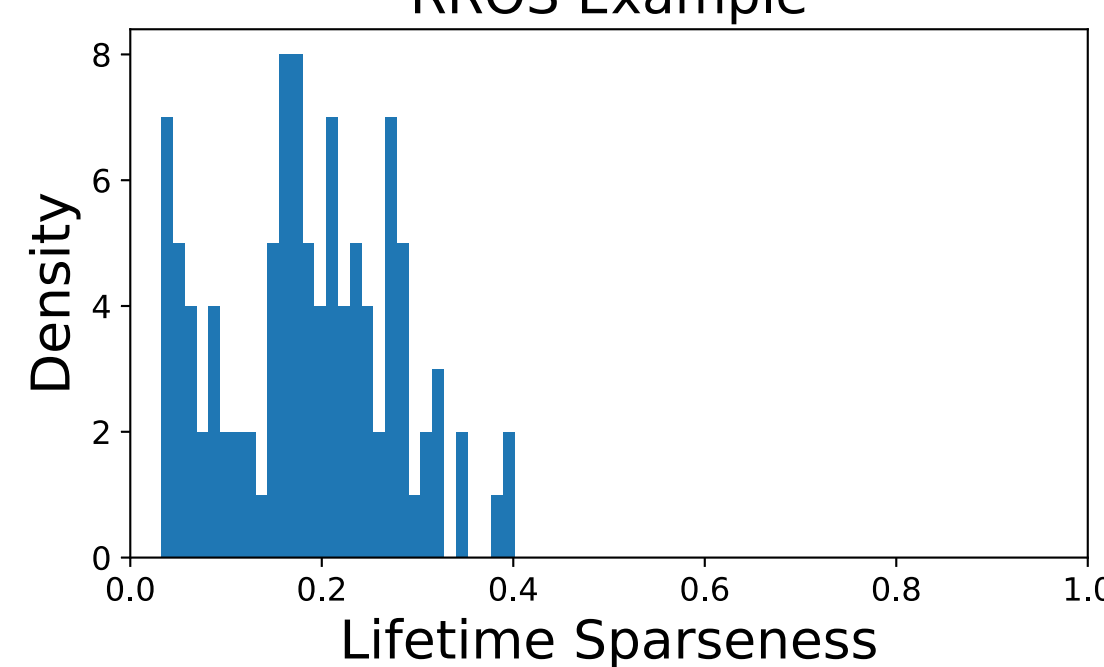

F

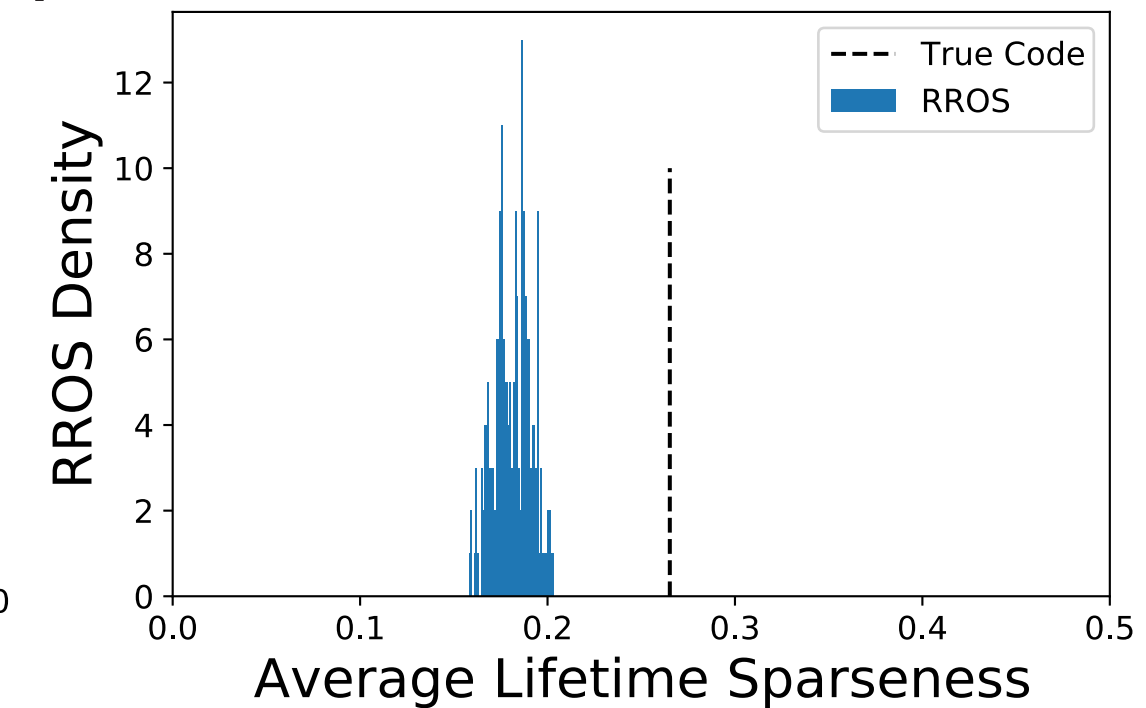

G

True Code

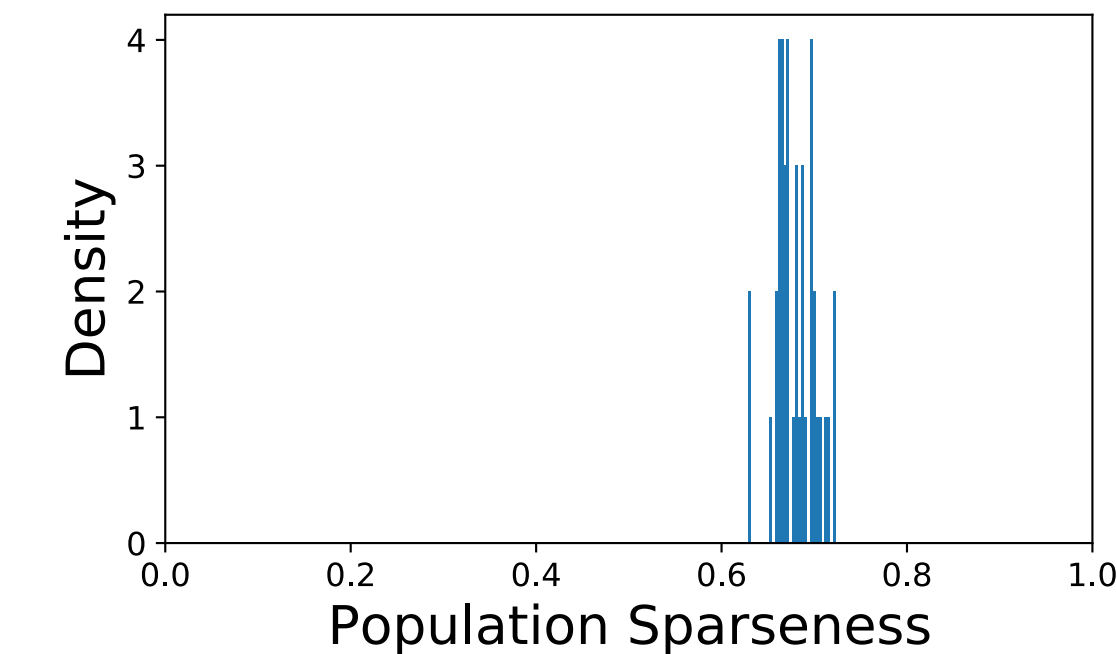

H

RROS Example

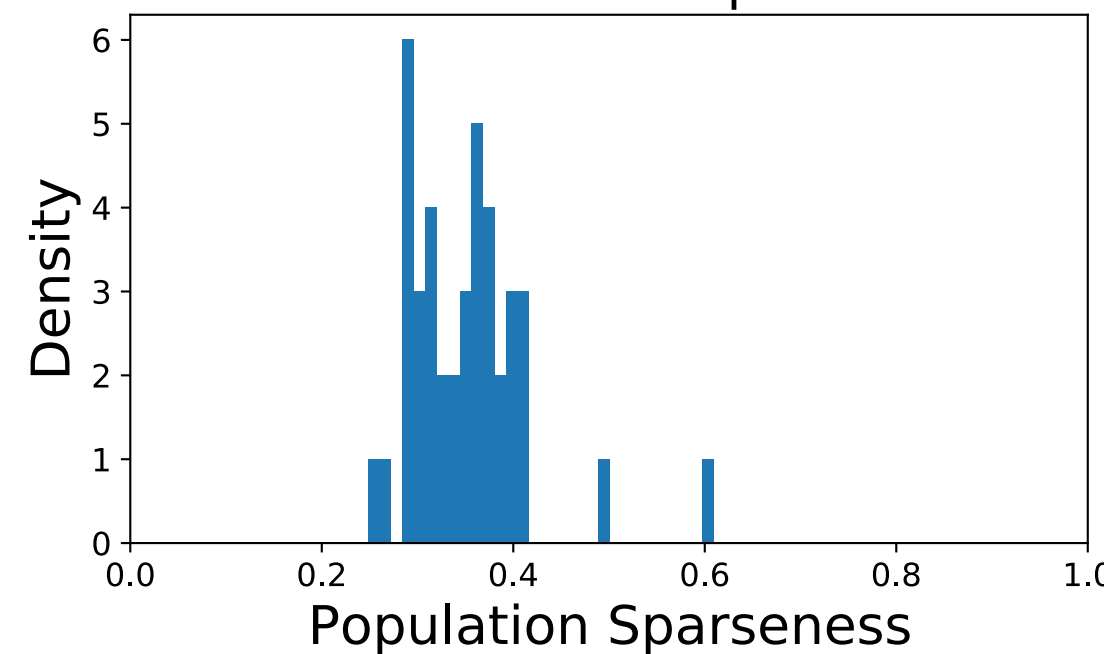

I

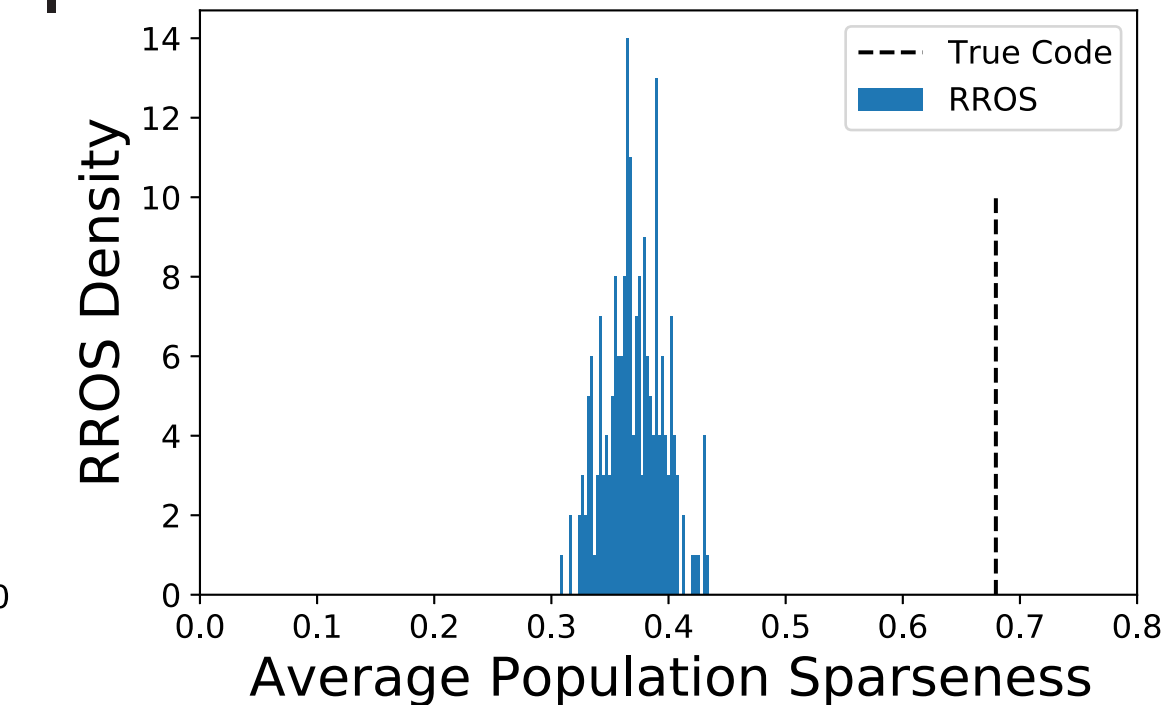

Supplement: supp [file elife-78606-supp-v1.zip]
