# Supplementary figures and images for: Population codes enable learning from few examples by shaping inductive bias
Source: eLife journal article supplement (doi:10.7554/elife.78606), 2022-12-16

A

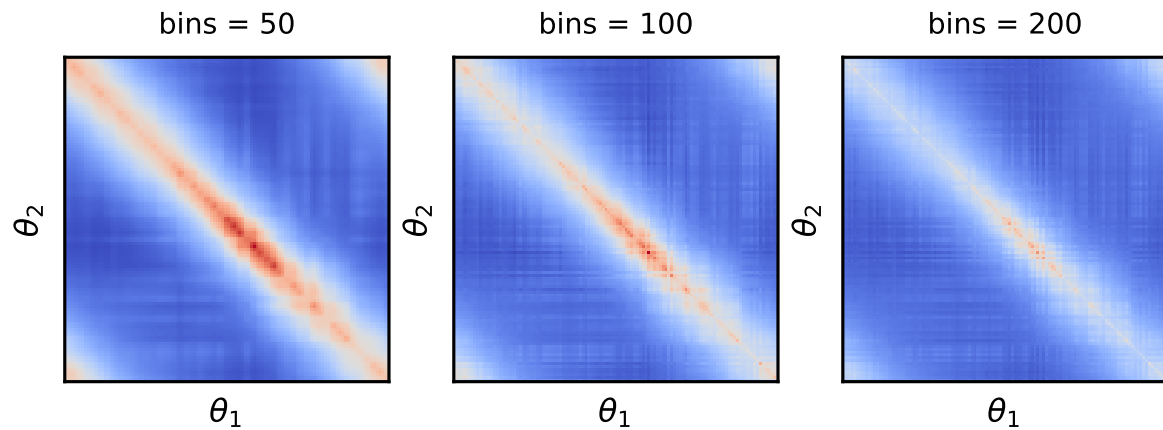

B

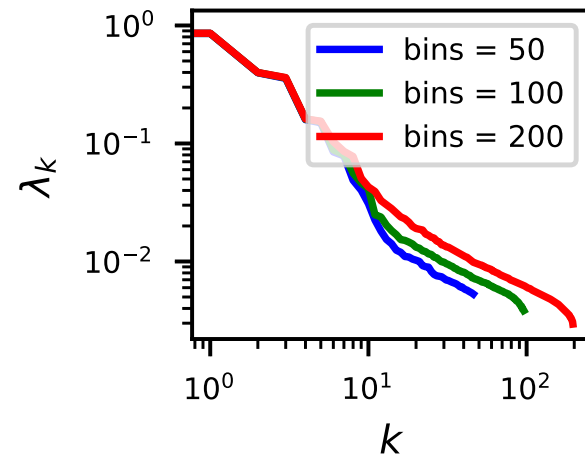

C

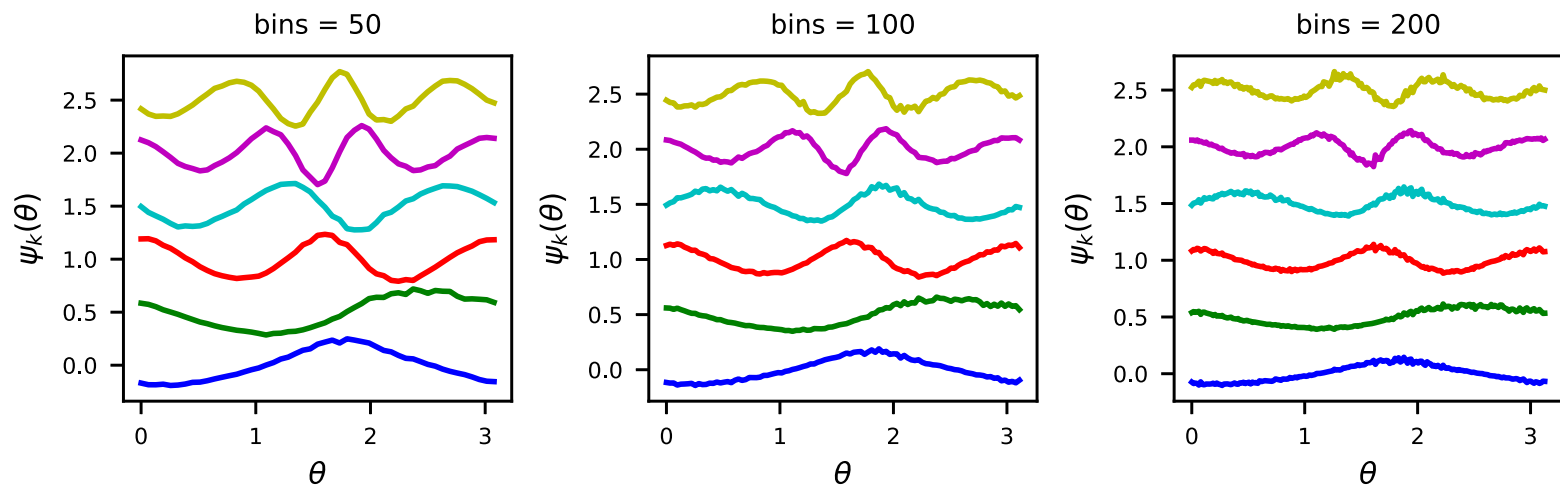

Supplement: supp [file elife-78606-supp-v1.zip]

**A**Gratings  $N = 10$ 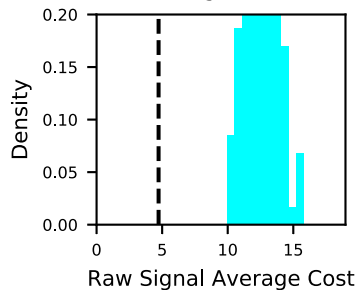Gratings  $N = 1000$ 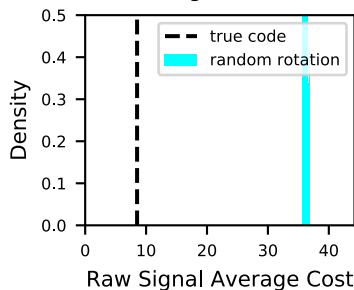

Gratings

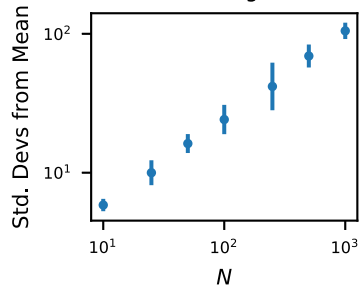**B**Gratings  $u_b = 3$ 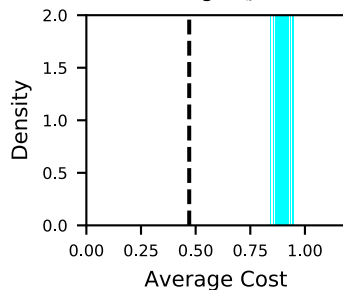Gratings  $u_b = 5$ 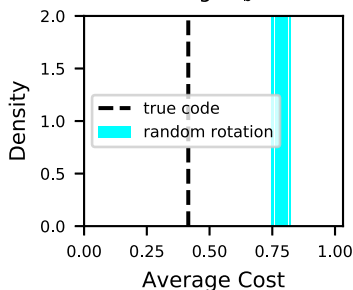

Gratings

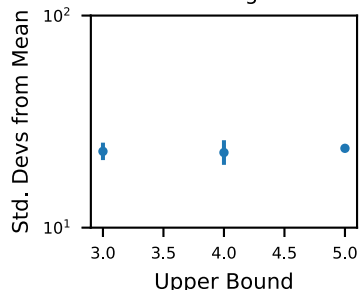**C**

Gratings

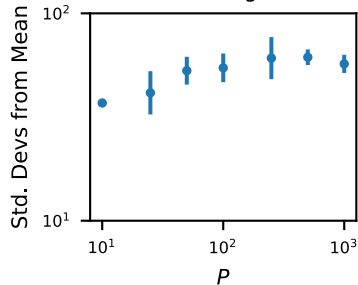

ImageNet

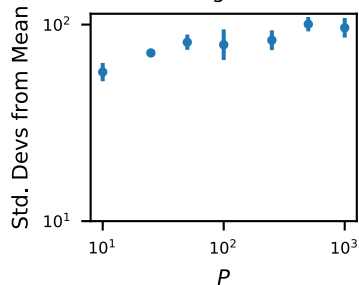

Supplement: supp [file elife-78606-supp-v1.zip]

A

 $r = 0.15$ 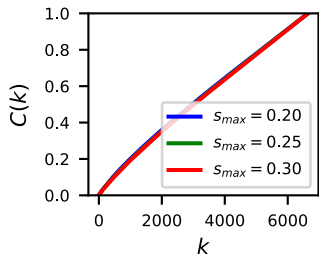 $r = 0.2$ 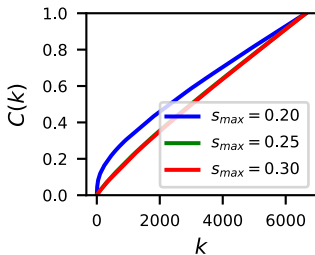 $r = 0.25$ 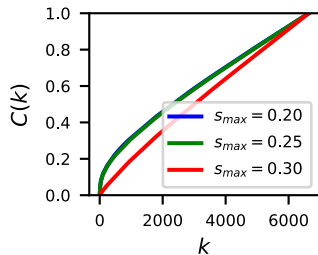

B

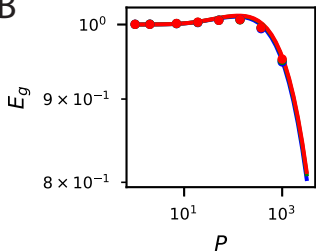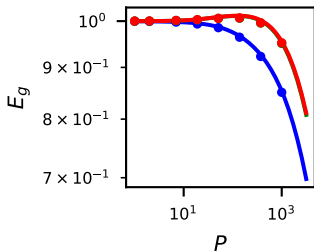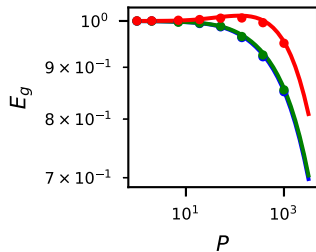

Supplement: supp [file elife-78606-supp-v1.zip]

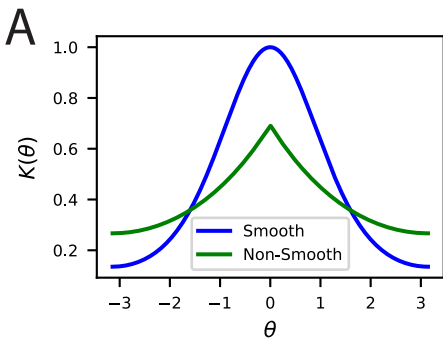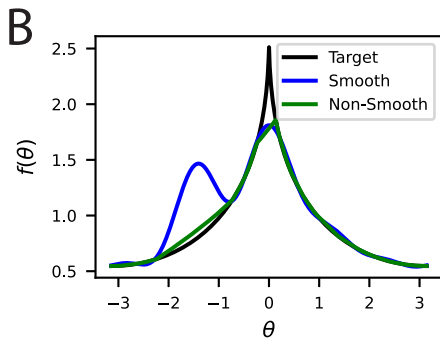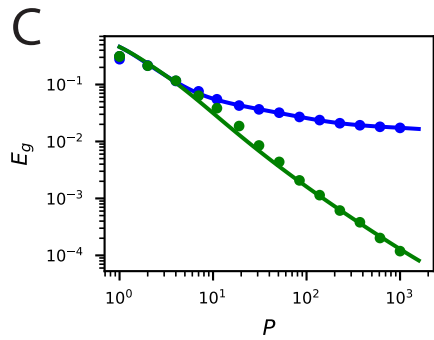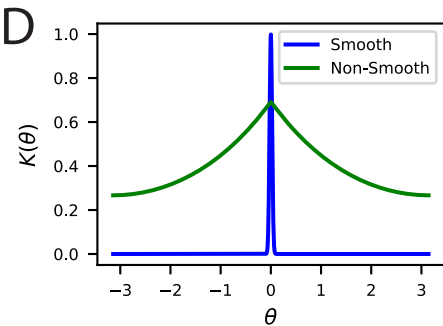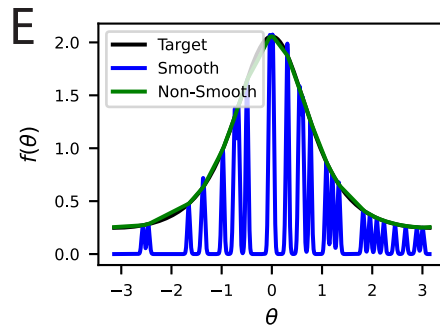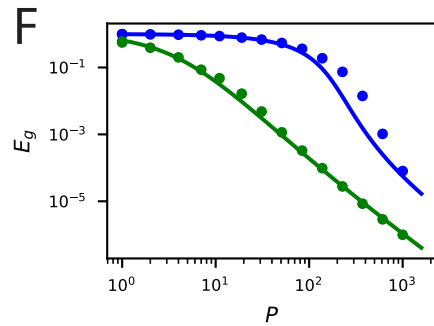

Supplement: supp [file elife-78606-supp-v1.zip]

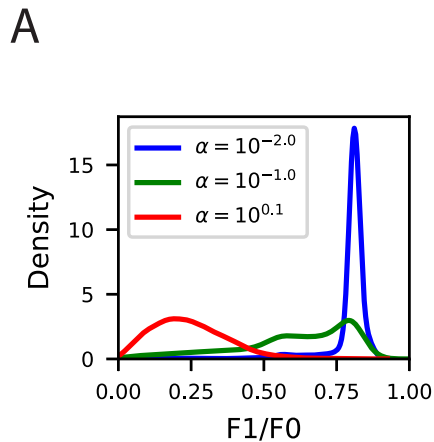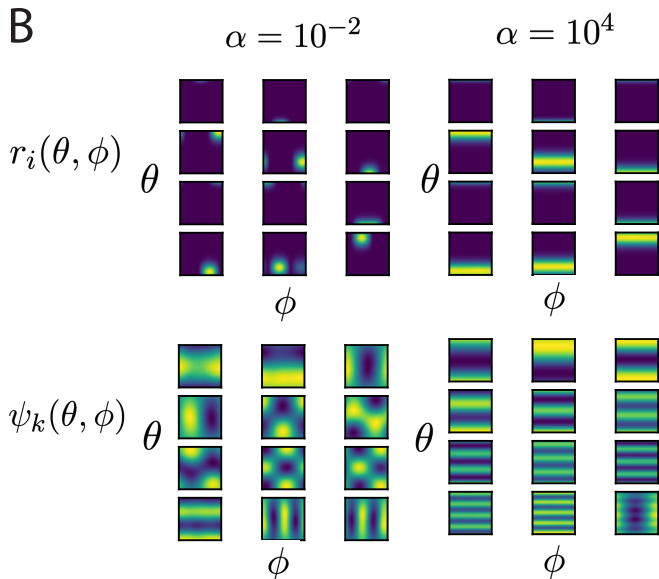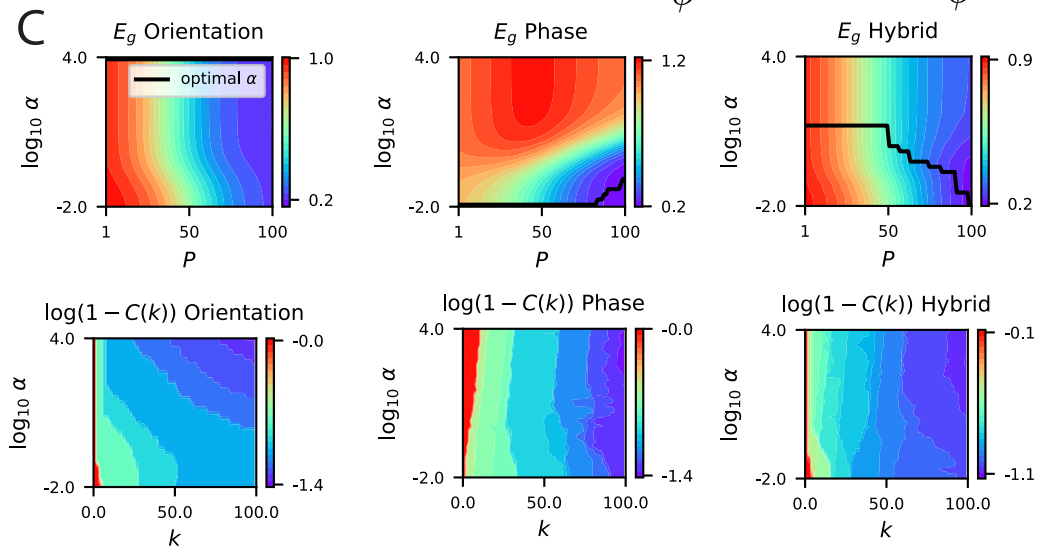

Supplement: supp [file elife-78606-supp-v1.zip]

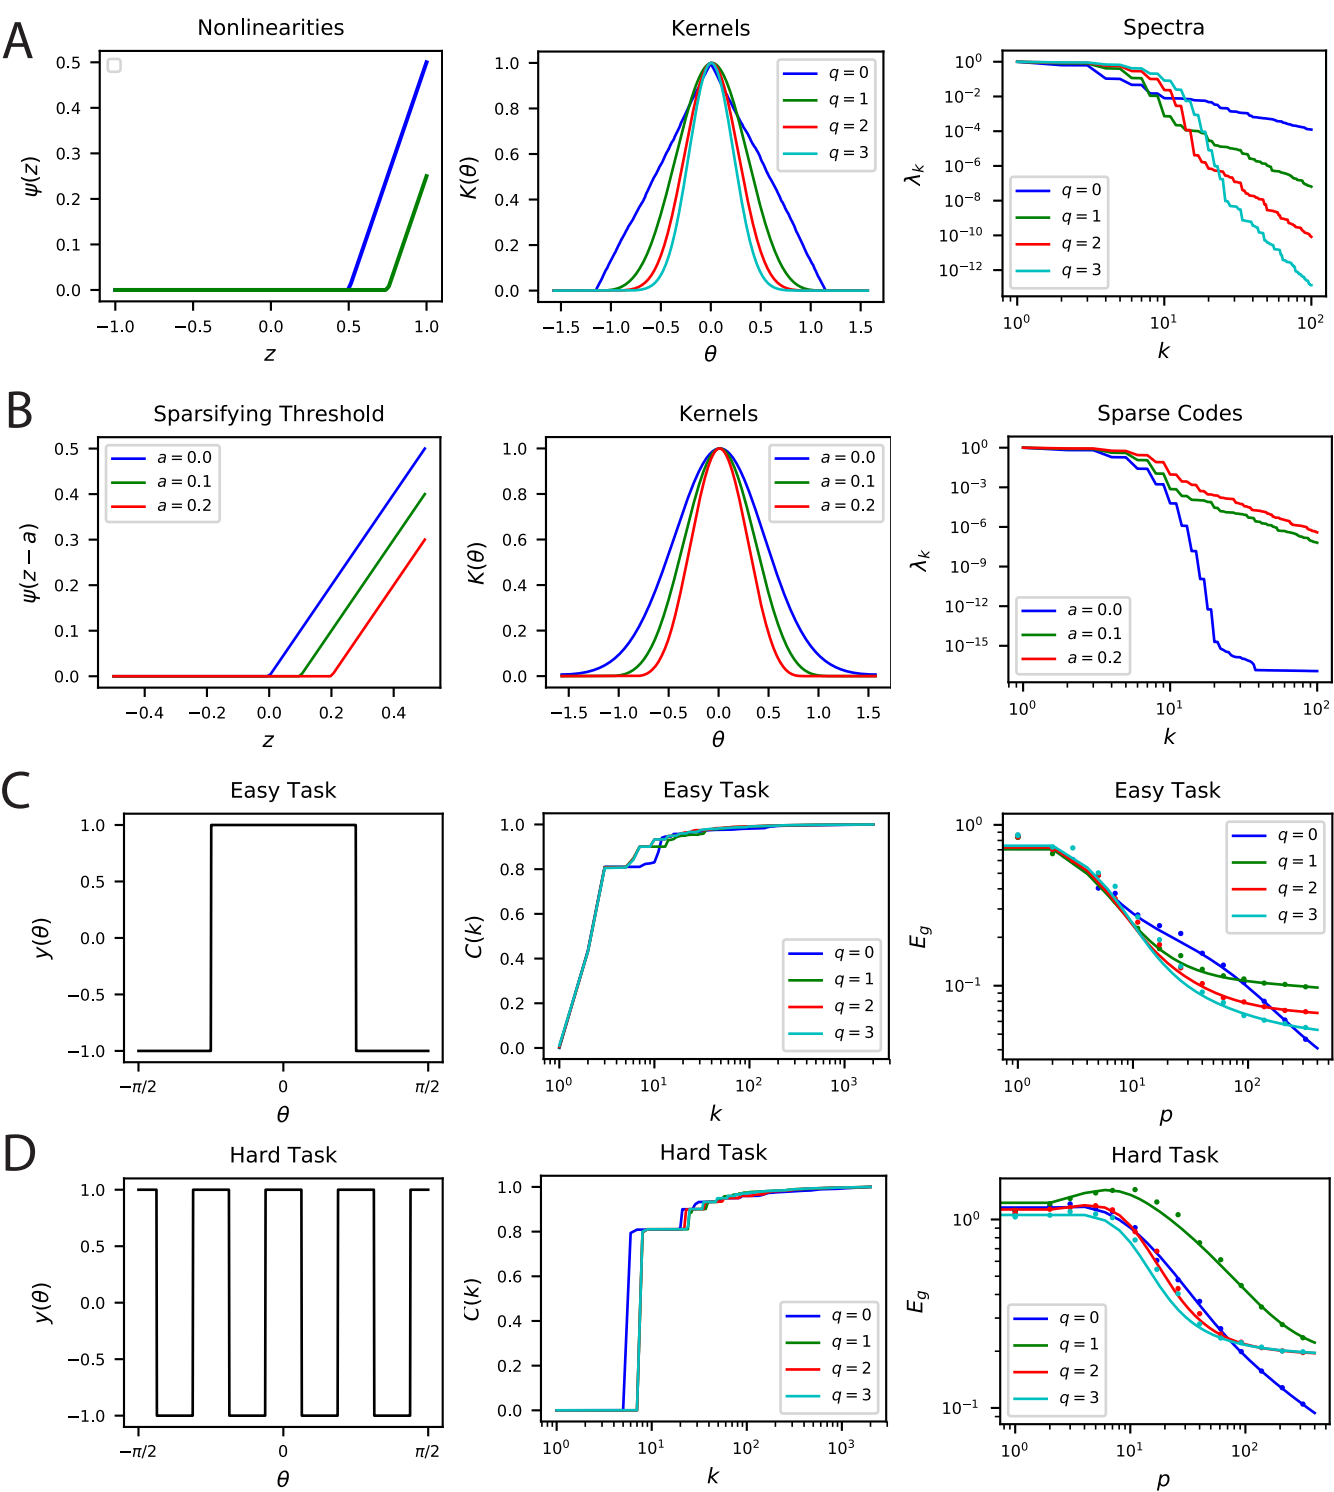

Supplement: supp [file elife-78606-supp-v1.zip]

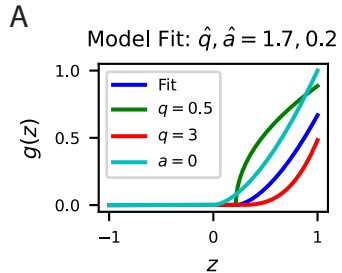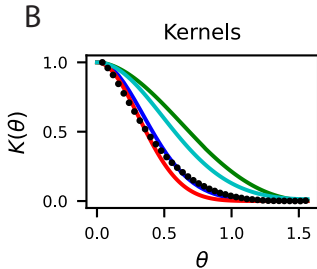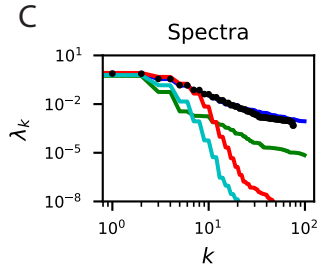

Supplement: supp [file elife-78606-supp-v1.zip]
